# Supplementary material
Source: PubMed Central journal article supplement (PMC3427100)
Supplement: 1211557109_pnas.1211557109_SI.pdf [file 1211557109_pnas.1211557109_SI.pdf]

# Supporting Information

Wang and Fersht 10.1073/pnas.1211557109

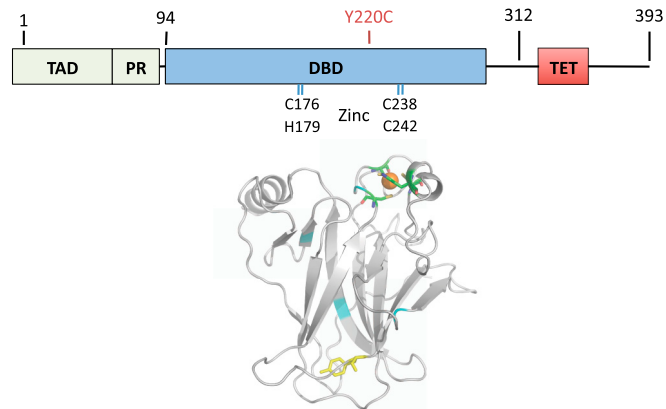

**Fig. S1.** Schematic of p53 structure. *Top*, location of domains in primary sequence and location of residues that bind  $Zn^{2+}$ . *Bottom*, cartoon representation of the structure of the stabilized p53 DNA-binding domain (PDB code 1UOL).  $Zn^{2+}$ -binding residues are in green, the four stabilizing mutation in cyan, and Y220 in yellow.

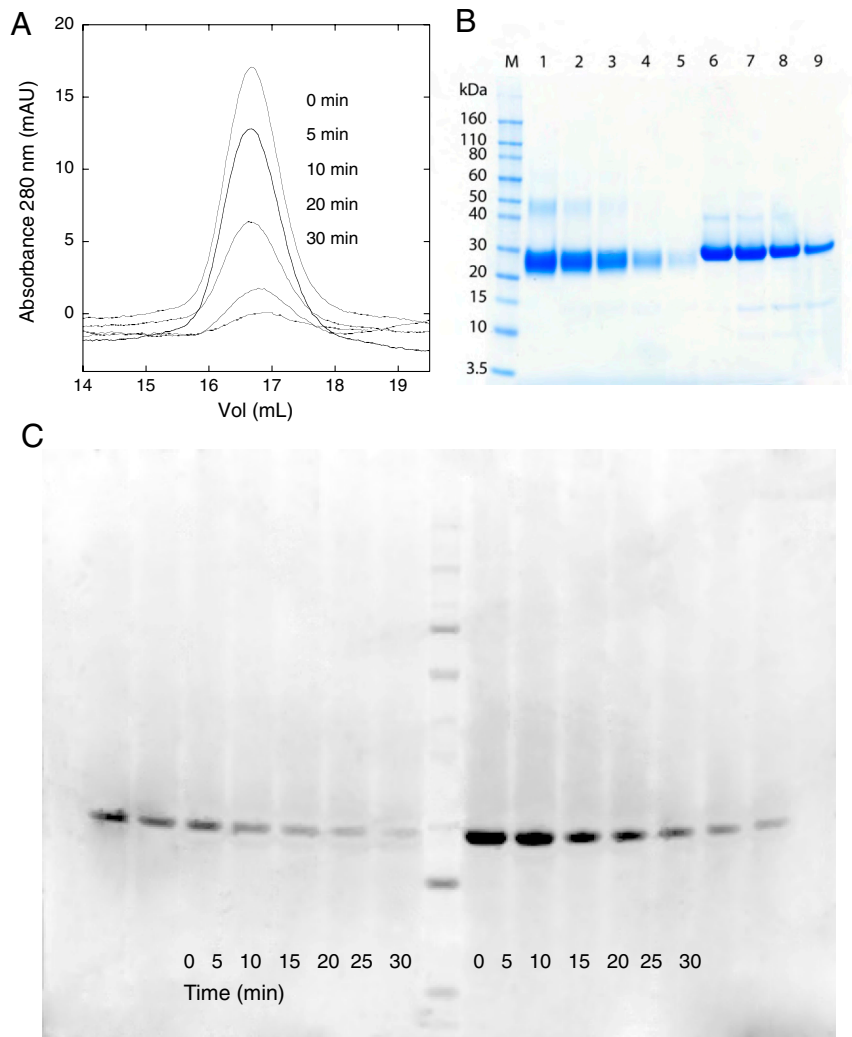

**Fig. S2.** Gel filtration and gel electrophoresis of samples of Y220C after incubation at 37 °C. (A) Time course of 12  $\mu$ M Y220C analysed by gel-filtration. (B) Time courses of 3  $\mu$ M protein assayed by SDS-electrophoresis and Coomassie Blue staining of samples that had been crosslinked (lanes 1–5) or not (lanes 6–9) prior to electrophoresis. (C) Time courses of 3  $\mu$ M (Left) and 12  $\mu$ M (Right) Y220C that were stained with SYPRO®Orange for quantitative analysis (without prior crosslinking).
